# Supplementary material for: Evaluating metal oxide support effects on the RWGS activity of Mo2C catalysts
Source: Royal Society of Chemistry journal article supplement (doi:10.1039/d3cy00026e), 2023-01-01
Supplement: d3cy00026e1.pdf [file d3cy00026e1.pdf]

## SUPPORTING INFORMATION

### Evaluating metal oxide support effects on the RWGS activity of Mo<sub>2</sub>C catalysts

Cameron F. Holder<sup>a\*</sup>, James R. Morse<sup>a</sup>, Patrick M. Barboun<sup>b</sup>, Andrew R. Shabaev<sup>a</sup>, Jeffrey W. Baldwin<sup>c</sup>, Heather D. Willauer<sup>a</sup>

<sup>a</sup> Materials Science and Technology Division, Naval Research Laboratory, Washington, D.C. 20375, USA

<sup>b</sup> NRC Postdoctoral Research Associate, Naval Research Laboratory, Washington, D.C. 20375, USA

<sup>c</sup> Acoustics Division, Naval Research Laboratory, Washington, D.C. 20375, USA

\* Corresponding Author at: Naval Research Laboratory, Washington, D.C. 20375, USA

*Email address:* cameron.holder@nrl.navy.mil

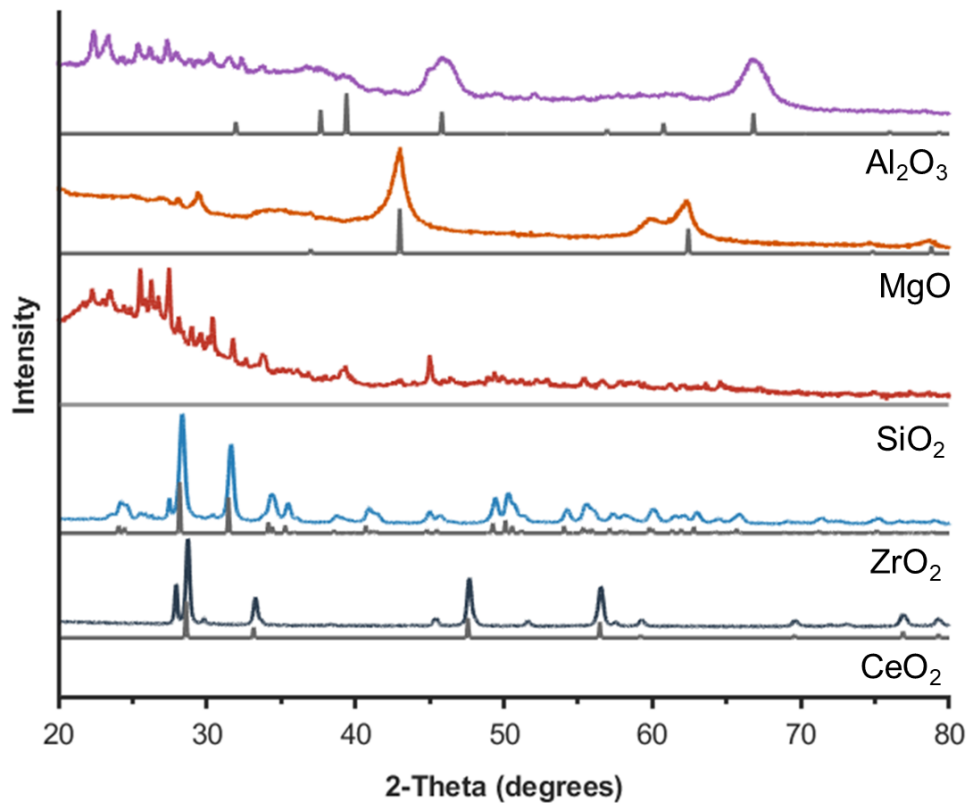

**Fig. S1** XRD patterns post-calcination depicting formed molybdenum oxides on the various metal oxide supports. The experimental patterns are shown in color while the corresponding metal oxide reference patterns are shown in gray.

**Table S1** Molybdenum oxides identified by XRD post-calcination for each support.

| <b>Material</b>                | <b>Molybdenum Oxides</b>                                                                 |
|--------------------------------|------------------------------------------------------------------------------------------|
| Al <sub>2</sub> O <sub>3</sub> | K <sub>2</sub> MoO <sub>4</sub> , KAl(MoO <sub>4</sub> ) <sub>2</sub> , MoO <sub>3</sub> |
| SiO <sub>2</sub>               | K <sub>2</sub> Mo <sub>4</sub> O <sub>13</sub> , MoO <sub>3</sub>                        |
| MgO                            | K <sub>10</sub> Mg(Mo <sub>7</sub> O <sub>27</sub> )                                     |
| ZrO <sub>2</sub>               | Zr(MoO <sub>4</sub> ) <sub>2</sub> , K <sub>2</sub> MoO <sub>4</sub> , MoO <sub>3</sub>  |
| CeO <sub>2</sub>               | KCe(MoO <sub>4</sub> ) <sub>2</sub>                                                      |

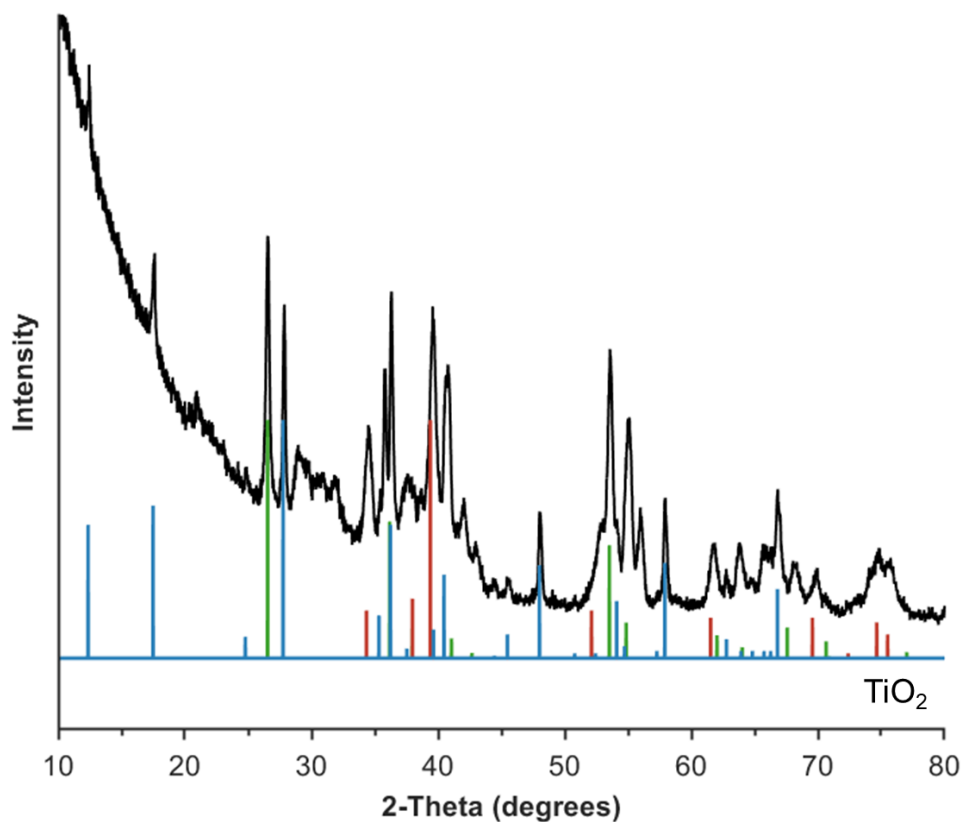

**Fig. S2** Experimental XRD pattern of K-Mo<sub>2</sub>C/TiO<sub>2</sub> (black) with the associated reference patterns of TiMoO<sub>4</sub> (green), KTi<sub>4</sub>O<sub>8</sub> (blue), and Mo<sub>2</sub>C (red). The remaining unidentified peaks could not be matched to a reference pattern but are most likely ascribed to other molybdenum or titanium-base metal oxides.

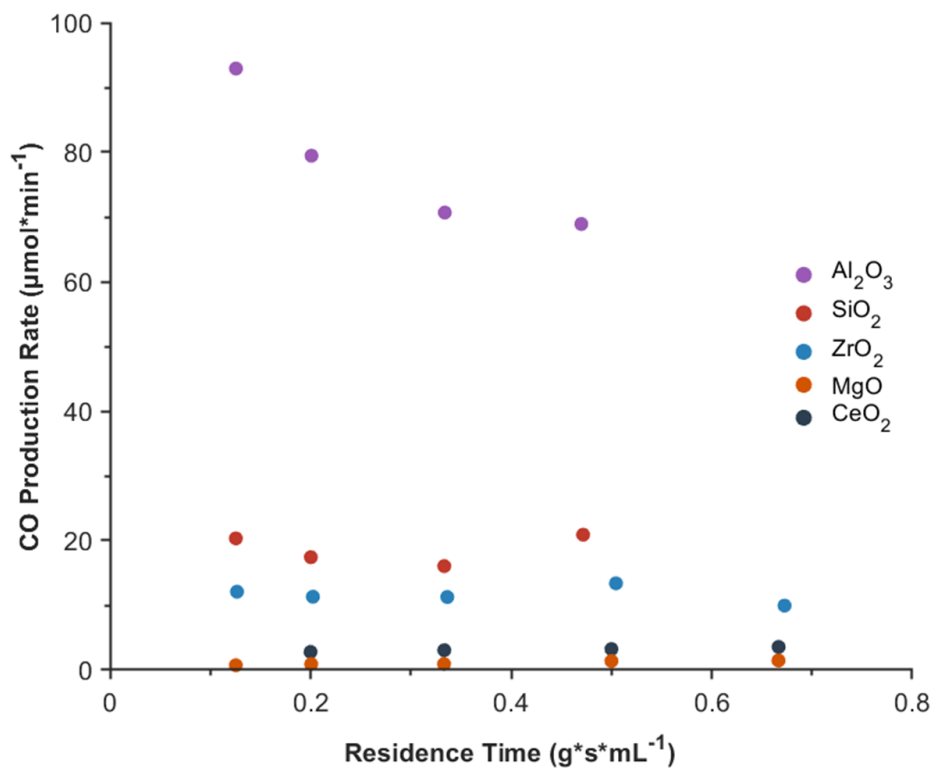

**Fig. S3** The production rate of CO as a function of residence time for K-Mo<sub>2</sub>C supported on various metal oxide supports. The CO turnover frequency was extracted from the y-intercept of the best fit line that was generated from data points at the three lowest residence times for each catalyst/support system.

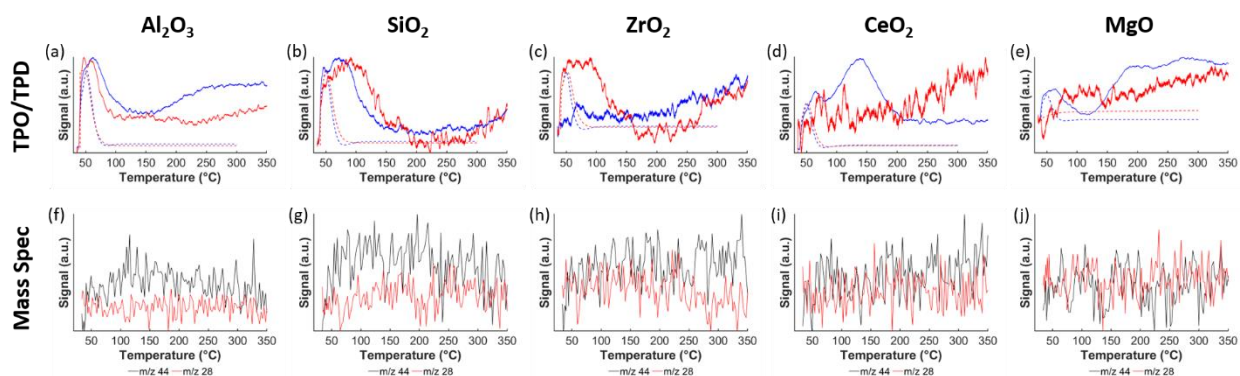

**Fig. S4** Temperature programmed oxidation (solid lines) and temperature programmed desorption (dashed lines) experiments for the bare metal oxide supports (blue) and supported K-Mo<sub>2</sub>C materials (red) are shown in the top row. The corresponding mass spectra for m/z 44 and 28 are shown in the bottom row for supported K-Mo<sub>2</sub>C. No significant increase in m/z 28 signal was observed indicating that either Mo<sub>2</sub>O<sub>x</sub>C<sub>y</sub> was not formed or the subsequent formation of CO was below the detectable limits of the mass spectrometer.

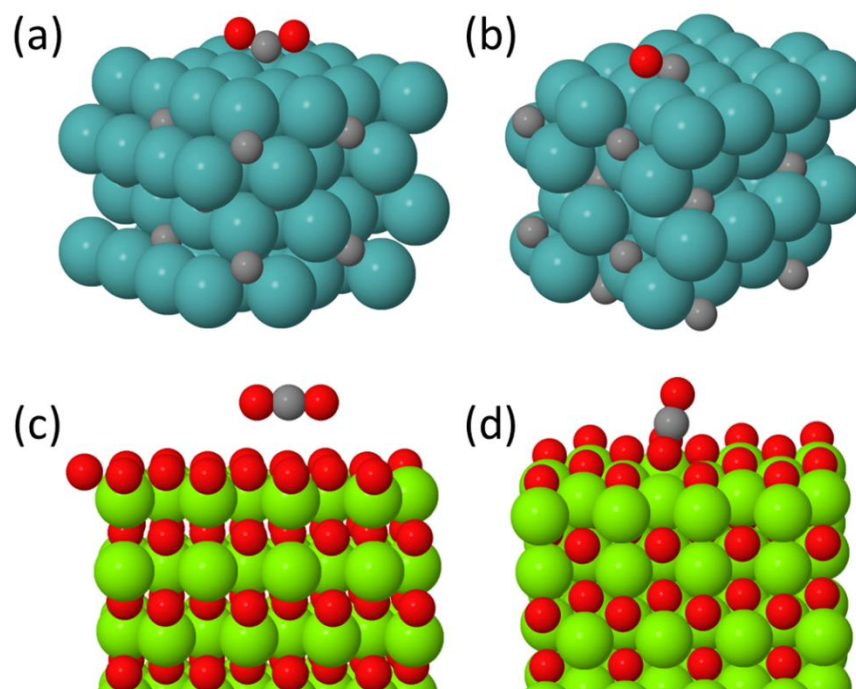

**Fig. S5** Computational models showing the interaction of CO<sub>2</sub> and CO when placed on bulk slabs of (a,b) Mo<sub>2</sub>C(100) and (c,d) MgO(111). The green spheres represent Mg, the red spheres represent O, the blue spheres represent Mo, and the gray spheres represent carbon.

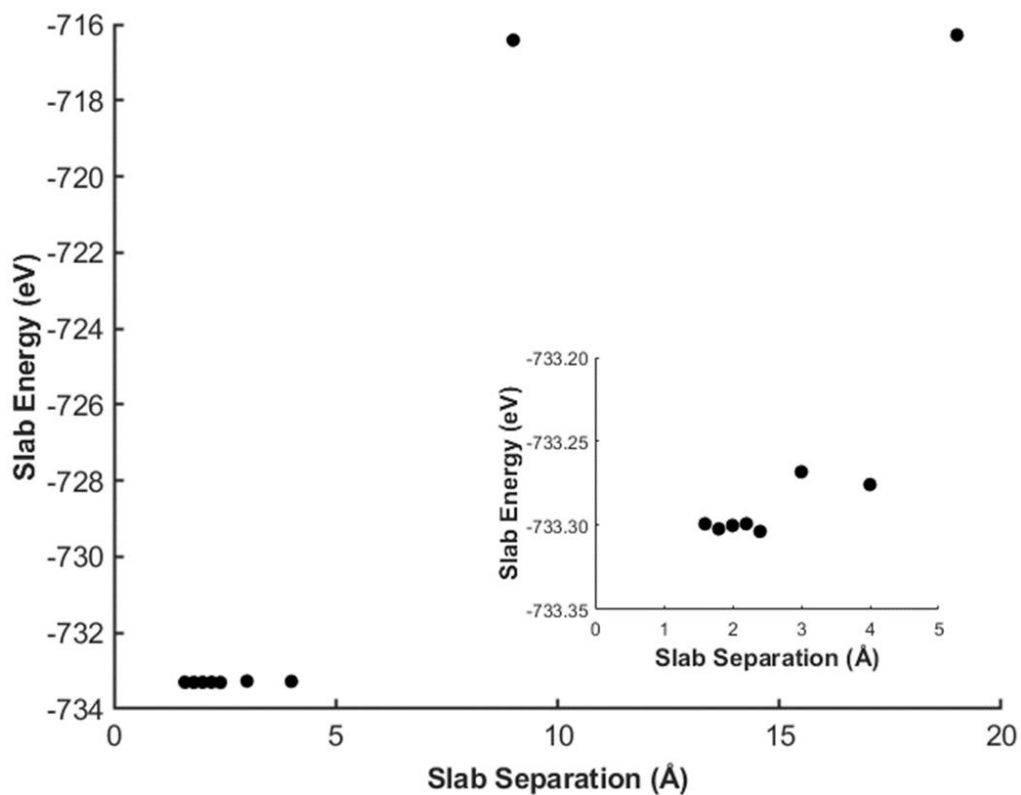

**Fig. S6** Relaxed energies of the combined slabs at various initial separation distances for Mo<sub>2</sub>C(100) and the O-terminated MgO(111) slabs. The inset shows a magnified region at lower initial slab separation distances. For initial separation distances less than 4 Å, the relaxed structure showed a separation distance of approximately 1.5 Å.



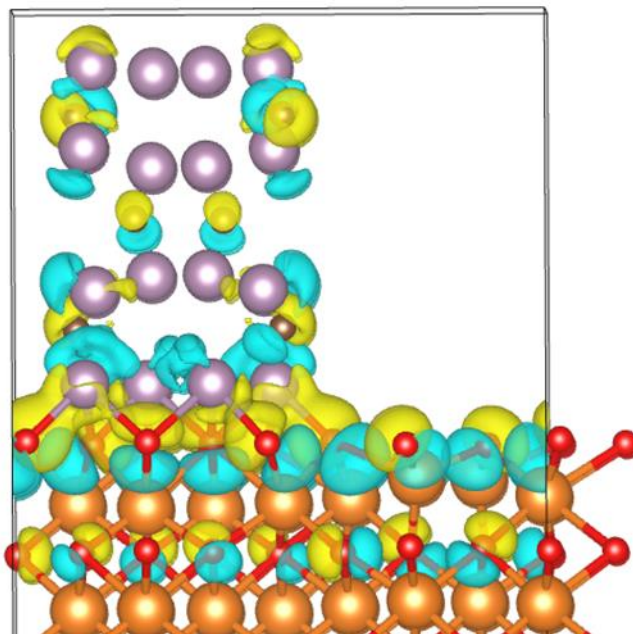

**Fig. S7** Charge density difference of the Mo<sub>2</sub>C(100) ribbon on top of the O-terminated MgO(111) slab. The yellow isosurfaces are indicative of areas with increased electron density whereas the blue isosurfaces indicate areas with decreased electron density.
